# Supplementary material
Source: PubMed Central journal article supplement (PMC4231654)
Supplement: supp_M114.591883_jbc.M114.591883-1.pdf [file supp_M114.591883_jbc.M114.591883-1.pdf]

## Supplemental Material

### Tables:

**Table S1:** Top 50 genes that were upregulated more than 2-fold with 1  $\mu$ M sodium arsenite treatment.

| Genes                                                                                                                                                                                                                                                                                                                                                      | Fold change |
|------------------------------------------------------------------------------------------------------------------------------------------------------------------------------------------------------------------------------------------------------------------------------------------------------------------------------------------------------------|-------------|
| metallothionein 1G                                                                                                                                                                                                                                                                                                                                         | 39.4        |
| metallothionein 1E                                                                                                                                                                                                                                                                                                                                         | 33.7        |
| histone cluster 1, H3j   histone cluster 1, H2bn   histone cluster 1, H3a   histone cluster 1, H3d   histone cluster 1, H3c   histone cluster 1, H3e   histone cluster 1, H3i   histone cluster 1, H3g   histone cluster 1, H3h   histone cluster 1, H3b   histone cluster 1, H3f                                                                          | 31.8        |
| metallothionein 1X                                                                                                                                                                                                                                                                                                                                         | 29.1        |
| histone cluster 1, H2ab   histone cluster 1, H2ae                                                                                                                                                                                                                                                                                                          | 24.0        |
| RNA, small nucleolar                                                                                                                                                                                                                                                                                                                                       | 22.9        |
| polo-like kinase 2 (Drosophila)                                                                                                                                                                                                                                                                                                                            | 21.7        |
| heat shock 70kDa protein 6 (HSP70B')                                                                                                                                                                                                                                                                                                                       | 21.0        |
| CDC28 protein kinase regulatory subunit 2                                                                                                                                                                                                                                                                                                                  | 21.0        |
| histone cluster 1, H3b   histone cluster 1, H2bn   histone cluster 1, H3a   histone cluster 1, H3d   histone cluster 1, H3c   histone cluster 1, H3e   histone cluster 1, H3i   histone cluster 1, H3g   histone cluster 1, H3j   histone cluster 1, H3h   histone cluster 1, H3f                                                                          | 20.9        |
| histone cluster 2, H2bf   histone cluster 2, H2ba   histone cluster 2, H3, pseudogene 2                                                                                                                                                                                                                                                                    | 20.3        |
| heat shock 70kDa protein 2                                                                                                                                                                                                                                                                                                                                 | 19.5        |
| histone cluster 1, H2bb                                                                                                                                                                                                                                                                                                                                    | 19.4        |
| histone cluster 1, H4d   histone cluster 4, H4   histone cluster 2, H4b   histone cluster 1, H4i   histone cluster 1, H4a   histone cluster 1, H4f   histone cluster 1, H4k   histone cluster 1, H4j   histone cluster 1, H4c   histone cluster 1, H4h   histone cluster 1, H4b   histone cluster 1, H4e   histone cluster 1, H4l   histone cluster 2, H4a | 19.0        |
| heat shock 70kDa protein 1B   heat shock 70kDa protein 1A                                                                                                                                                                                                                                                                                                  | 18.8        |
| heat shock 70kDa protein 1B   heat shock 70kDa protein 1A                                                                                                                                                                                                                                                                                                  | 18.7        |
| histone cluster 1, H4a   histone cluster 4, H4   histone cluster 2, H4b   histone cluster 1, H4i   histone cluster 1, H4d   histone cluster 1, H4f   histone cluster 1, H4k   histone cluster 1, H4j   histone cluster 1, H4c   histone cluster 1, H4h   histone cluster 1, H4b   histone cluster 1, H4e   histone cluster 1, H4l   histone cluster 2, H4a | 18.2        |

|                                                                                                                                                                                                                                                                                                                                                            |      |
|------------------------------------------------------------------------------------------------------------------------------------------------------------------------------------------------------------------------------------------------------------------------------------------------------------------------------------------------------------|------|
| metallothionein 2A                                                                                                                                                                                                                                                                                                                                         | 18.0 |
| heat shock 70kDa protein 1B   heat shock 70kDa protein 1A                                                                                                                                                                                                                                                                                                  | 17.4 |
| histone cluster 2, H2bf   histone cluster 2, H2ba                                                                                                                                                                                                                                                                                                          | 17.2 |
| small nucleolar RNA, C/D box 75                                                                                                                                                                                                                                                                                                                            | 16.9 |
| histone cluster 1, H3h   histone cluster 1, H2bn   histone cluster 1, H3a   histone cluster 1, H3d   histone cluster 1, H3c   histone cluster 1, H3e   histone cluster 1, H3i   histone cluster 1, H3g   histone cluster 1, H3j   histone cluster 1, H3b   histone cluster 1, H3f                                                                          | 16.6 |
| histone cluster 1, H1a                                                                                                                                                                                                                                                                                                                                     | 16.5 |
| histone cluster 1, H3a   histone cluster 1, H2bn   histone cluster 1, H3d   histone cluster 1, H3c   histone cluster 1, H3e   histone cluster 1, H3i   histone cluster 1, H3g   histone cluster 1, H3j   histone cluster 1, H3h   histone cluster 1, H3b   histone cluster 1, H3f                                                                          | 16.0 |
| histone cluster 1, H2ag   histone cluster 1, H2ai   histone cluster 1, H2ak   histone cluster 1, H2aj   histone cluster 1, H2al   histone cluster 1, H2am                                                                                                                                                                                                  | 15.8 |
| histone cluster 1, H2bg   histone cluster 1, H2bf   histone cluster 1, H2be   histone cluster 1, H2bi   histone cluster 1, H2bc                                                                                                                                                                                                                            | 15.1 |
| metallothionein 1G                                                                                                                                                                                                                                                                                                                                         | 14.8 |
| small nucleolar RNA, C/D box 25   small nucleolar RNA host gene (non-protein coding) 1                                                                                                                                                                                                                                                                     | 14.2 |
| small nucleolar RNA, C/D box 74                                                                                                                                                                                                                                                                                                                            | 14.1 |
| heat shock 70kDa protein 1A   heat shock 70kDa protein 1B                                                                                                                                                                                                                                                                                                  | 14.1 |
| heat shock 70kDa protein 1A   heat shock 70kDa protein 1B                                                                                                                                                                                                                                                                                                  | 13.9 |
| histone cluster 2, H2be                                                                                                                                                                                                                                                                                                                                    | 13.8 |
| histone cluster 1, H2am   histone cluster 1, H2ai   histone cluster 1, H2ak   histone cluster 1, H2aj   histone cluster 1, H2al   histone cluster 1, H2ag                                                                                                                                                                                                  | 13.6 |
| regulator of G-protein signaling 2, 24kDa                                                                                                                                                                                                                                                                                                                  | 13.1 |
| RNA, U5E small nuclear                                                                                                                                                                                                                                                                                                                                     | 12.8 |
| histone cluster 1, H4l   histone cluster 4, H4   histone cluster 2, H4b   histone cluster 1, H4i   histone cluster 1, H4a   histone cluster 1, H4d   histone cluster 1, H4f   histone cluster 1, H4k   histone cluster 1, H4j   histone cluster 1, H4c   histone cluster 1, H4h   histone cluster 1, H4b   histone cluster 1, H4e   histone cluster 2, H4a | 12.7 |
| SERTA domain containing 1                                                                                                                                                                                                                                                                                                                                  | 12.6 |
| RNA, U11 small nuclear                                                                                                                                                                                                                                                                                                                                     | 12.5 |

|                                                                                                                                                                                                                                                                                                                                                                                                                                               |      |
|-----------------------------------------------------------------------------------------------------------------------------------------------------------------------------------------------------------------------------------------------------------------------------------------------------------------------------------------------------------------------------------------------------------------------------------------------|------|
| histone cluster 1, H2ai   histone cluster 1, H3h   histone cluster 1, H2ak   histone cluster 1, H2aj   histone cluster 1, H2al   histone cluster 1, H2am   histone cluster 1, H2ag   histone cluster 1, H2bn   histone cluster 1, H3a   histone cluster 1, H3d   histone cluster 1, H3c   histone cluster 1, H3e   histone cluster 1, H3i   histone cluster 1, H3g   histone cluster 1, H3j   histone cluster 1, H3b   histone cluster 1, H3f | 12.4 |
| heme oxygenase (decycling) 1                                                                                                                                                                                                                                                                                                                                                                                                                  | 11.9 |
| heat shock 70kDa protein 6 (HSP70B')                                                                                                                                                                                                                                                                                                                                                                                                          | 11.7 |
| histone cluster 1, H4b   histone cluster 4, H4   histone cluster 2, H4b   histone cluster 1, H4i   histone cluster 1, H4a   histone cluster 1, H4d   histone cluster 1, H4f   histone cluster 1, H4k   histone cluster 1, H4j   histone cluster 1, H4c   histone cluster 1, H4h   histone cluster 1, H4e   histone cluster 1, H4l   histone cluster 2, H4a                                                                                    | 11.5 |
| small nucleolar RNA, C/D box 77                                                                                                                                                                                                                                                                                                                                                                                                               | 10.7 |
| small nucleolar RNA, C/D box 27   small nucleolar RNA host gene (non-protein coding) 1                                                                                                                                                                                                                                                                                                                                                        | 10.6 |
| histone cluster 1, H2bj                                                                                                                                                                                                                                                                                                                                                                                                                       | 10.5 |
| histone cluster 1, H2ah                                                                                                                                                                                                                                                                                                                                                                                                                       | 10.2 |
| histone cluster 1, H3c   histone cluster 1, H2bn   histone cluster 1, H3a   histone cluster 1, H3d   histone cluster 1, H3e   histone cluster 1, H3i   histone cluster 1, H3g   histone cluster 1, H3j   histone cluster 1, H3h   histone cluster 1, H3b   histone cluster 1, H3f                                                                                                                                                             | 10.2 |
| histone cluster 2, H3a   histone cluster 2, H3c   histone cluster 2, H3d                                                                                                                                                                                                                                                                                                                                                                      | 10.1 |
| histone cluster 2, H3a   histone cluster 2, H3c   histone cluster 2, H3d                                                                                                                                                                                                                                                                                                                                                                      | 10.1 |
